# Supplementary material for: Optimizing Seminal Quality Prediction Using Machine Learning with Data Preprocessing and Feature Selection
Source: Research Square preprint supplement (doi:10.21203/rs.3.rs-5930473/v1), 2025-04-09

Supplementary tables 1. Questionnaire to predict seminal quality

| Variable Names | Value Ranges (min – max) |
| --- | --- |
| Season | Winter, Spring, Summer, Fall |
| Age | in years like 18 – so on |
| Body Mass Index (BMI) | 17 – 34 |
| Marital Status | Unmarried (without a partner), unmarried (with partner), married, other |
| Childern | Yes or No |
| Birth city | City where a person lives |
| City of the family home | Native city where family lives |
| Residence City while doing a course | Current residence while doing a course |
| Number of siblings | 0 – so on |
| Birth defect, heredity disease or any genetic disorder | Yes or No |
| Childish disease (like chicken pox, mumps, measles, polio) | Yes or No |
| Vacines received | Childern calendar, childern calendar and tetanus, tetanus only |
| Allergy | Yes or No |
| Accident or any serious injury | Yes or No |
| Surgical intervention | Yes or No |
| Significant disease | Yes or No |
| High fever in last year | Less than 3 months ago, more than three months ago, no |
| Chemotherapy | Yes or No |
| Radiations (like X-Ray) | Yes or No |
| Time since radiations exposure | Less than three months, more than three months |
| No. of exposures | 0 – so on |
| Alcohol consumption rate | Several times in a day, everyday, several times in a week, once in a week, hardly ever or never |
| Alcohol consumption (grams/week) | 0 – so on |
| Smoking habit | Daily, ocasionly, never |
| Average no. of cigerates/day | 0 – so on |
| Exposure to cigerate in years | 0 – so on |
| Coffee consumption | 1 – 2 coffees in a day, 3 – 5 coffees in a day, more than 5 coffees in a day, none |
| Drugs consumption | Yes or No |
| No. of hours spent sitting/day | 1 – so on |
| Average hours sleepiing/day | 1 – so on |
| Wearing tight clothes | Yes or No |
| Warm baths | Yes or No |
| Average hours plyaing sports/week | 0 – so on |
| Average ejaculations/week | 1 – so on |

supplementary tables 2 .

| Ref. | Year | Techniques Used | Accuracy Measures |
| --- | --- | --- | --- |
| [17] | 2019 | ANN | Uses ANN to predict seminal quality and gives a comparative study on sperm motality. |
| [18] | 2019 | ANN | Uses 10-k fold cross validatio with ANN to predict seminal quality and gives 89% accuracy |
| [22] | 2019 | MLP, DT, SVM, NB, AdaBoost | Make comparison with different techniques and proposed accuracy 95.1% with AdaBoost. |
| [38] | 2014 | DT, NB, MLP, SVM, SVM+PSO | Uses different classification algorithms plus feature selection techniques to predict seminal quality. |
| [21] | 2018 | SVM, DT | Breifly explained feature extraction techniques and applied different classification algorithms to predict chronic heart disease patients. |
| [26] | 2018 | Genetic Approach and SVM | Uses optimized feature extraction techniques to predict heart disease patients. |
| [14] | 2019 | Ensemble Learning | Uses ensemble learning approaches to predict living environment based on life index. |
| [22] | 2019 | Evolutionary Algorithms, SMOTE | Uses safe level evolutionary algorithms with SMOTE to predict the seminal quality and produces accuracy value of 95.1%. |
| [24] | 2018 | (Rules, Trees, Lazy, Function, Ensemble) Voting, Random Forest | Uses multiple algorithms and evaluates Dissimilarity Performance (DP) to evaluate which classifier outperforms. Voting outperformed in proposed research. |
| [15] | 2020 | Ensemble Learning | Uses extreme machine learning algorithm for oxygen dissolve prediction. |
| [23] | 2017 | Deep Neural Network (DNN) | Uses DNN to predict fertility quality and gives 90 % of accuracy value. |
| [33] | 2019 | SMOTE Algorithm | Uses smote to analysis different applications to handle imbalanced dataset. |
| [36] | 2018 | Genetic Algorithm | Uses genetic algroithm to handle the imbalance dataset to predict diabetic patients. |
| [37] | 2019 | Hybrid data handling approaches | Uses hybrid approach to perform pre-processing in order to handle the imbalanced dataset. |

Supplementary tables 3. Description of fertility dataset

| Attributes | Attribute Description |
| --- | --- |
| Season | In which the analysis is being done (winter, spring, summer or fall) |
| Age | In which age the analysis of a patient is being done (18 to 36) |
| Chidesh-Disease | Whether a patient have any childesh disease such as chicken pox, polio, measles (Yes or No) ? |
| Accident or Serious Injuries | Whether a patient have any serious injury or not (Yes or No) ? |
| Surgical Intervention | Whether a patient have surgical intervention or not (Yes or No)? |
| High Fever | (Less than 3-months ago, more than 3-months ago, No) |
| Alcohol Consumption | Whether a patient used alcohol (several times a day, every day, many times in a week, once in a week, hardly ever or never) |
| Smoking habits | (Never, occasionally, daily) |
| No. of hours spent sitting/day | 1 to 16 |
| Class Labels | Normal or Altered |

supplementary tables 4 . Accuracy comparison with previous work.

| Literature | Pre-processing | Classifier | Precision | Recall | Accuracy |
| --- | --- | --- | --- | --- | --- |
| Sahoo et al. [38] | - | SVM | 0.874 | 0.200 | 0.860 |
| Sahoo et al. [38] | - | SVM + PSO | 0.911 | 0.333 | 0.850 |
| Sahoo et al. [38] | - | DT | 0.874 | 0.200 | 0.860 |
| Sahoo et al. [38] | - | NB | 0.899 | 0.250 | 0.830 |
| Sahoo et al. [38] | Feature Extraction | MLP | 0.922 | 0.417 | 0.920 |
| Sahoo et al. [38] | Feature Extraction | SVM | 0.916 | 0.330 | 0.910 |
| Sahoo et al. [38] | Feature Extraction | SVM + PSO | 0.955 | 0.667 | 0.940 |
| Sahoo et al. [38] | Feature Extraction | DT | 0.923 | 0.416 | 0.890 |
| Sahoo et al. [38] | Feature Extraction | NB | 0.905 | 0.250 | 0.890 |
| J Ma. et al. [22] | ESLSMOTE | BPNN | 0.927 | 0.913 | 0.923 |
| J Ma. et al. [22] | ESLSMOTE | AdaBoost | 0.955 | 0.972 | 0.951 |
| J Ma. et al. [22] | ESLSMOTE | SVM | 0.845 | 0.922 | 0.861 |
| Proposed | Imbalanced Learning + Feature extraction | Bagging | 0.867 | 0.867 | 84.91 |
| Proposed | Imbalanced Learning + Feature extraction | RF | 0.935 | 0.967 | 0.943 |
| Proposed | Imbalanced Learning + Feature extraction | XG-Boost | 1.000 | 0.931 | 0.962 |

Supplementary tables 5. Subset evaluation of feature selection method

| Attributes Evaluators | CFS-Subset-Eval |
| --- | --- |
| Classifier-Attribute-Eval |
| Correlation-Attribute-Eval |
| Info-Gain-Attribute-Eval |
| Gain-Ratio-Attribute-Eval |
| One-RAttribute-Eval |
| Symmetric-Attribute-Eval |
| Relief-Attribute-Eval |
| Wrapper-Subset-Eval |
| ***Subset Searching Approaches*** | Best-First |
| Greedy-Stepwise |
| Ranker |

supplementary tables  *6. Feature selection techniques*

| Method | Advantages | Disadvantages | Examples |
| --- | --- | --- | --- |
| 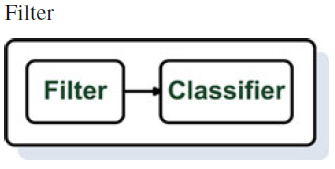 | Independence of classifier  Lower computational cost thann wrappers  Fast  Good generalization ability | No interaction with the classifer | Consistensy-based CFS  Md  INTERACT  ReliefF |
| 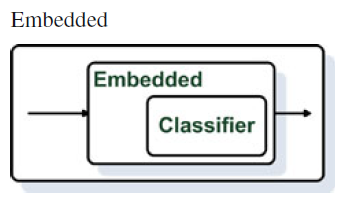 | Interaction with classifier  Lower computational cost thann  wrappers  Captures feature dependencies | Classifier-dependent selection | FS-Perceptron  SVM_RFE |
| 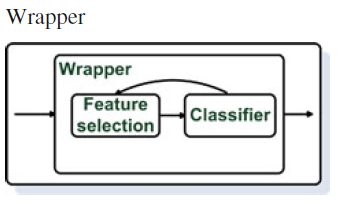 | Interaction with classifier  Captures feature dependencies | Computationally expensive  Risk of overfitting  Classifier dependent selection | Wrapper-C4.5  Wrapper SVM |

Supplementary figure 1. Feature Extraction using Optimized Machine Learning Approaches


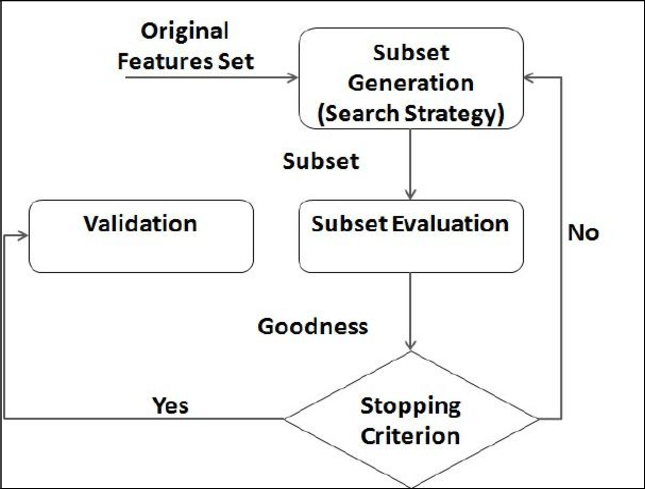


supplementary figure 2. Decision Making Tree


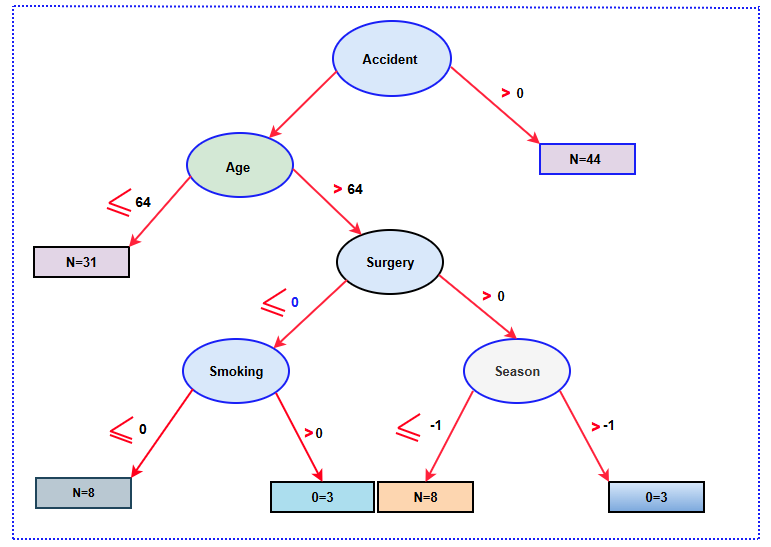


supplementary figure 3. A general procedure for feature extraction


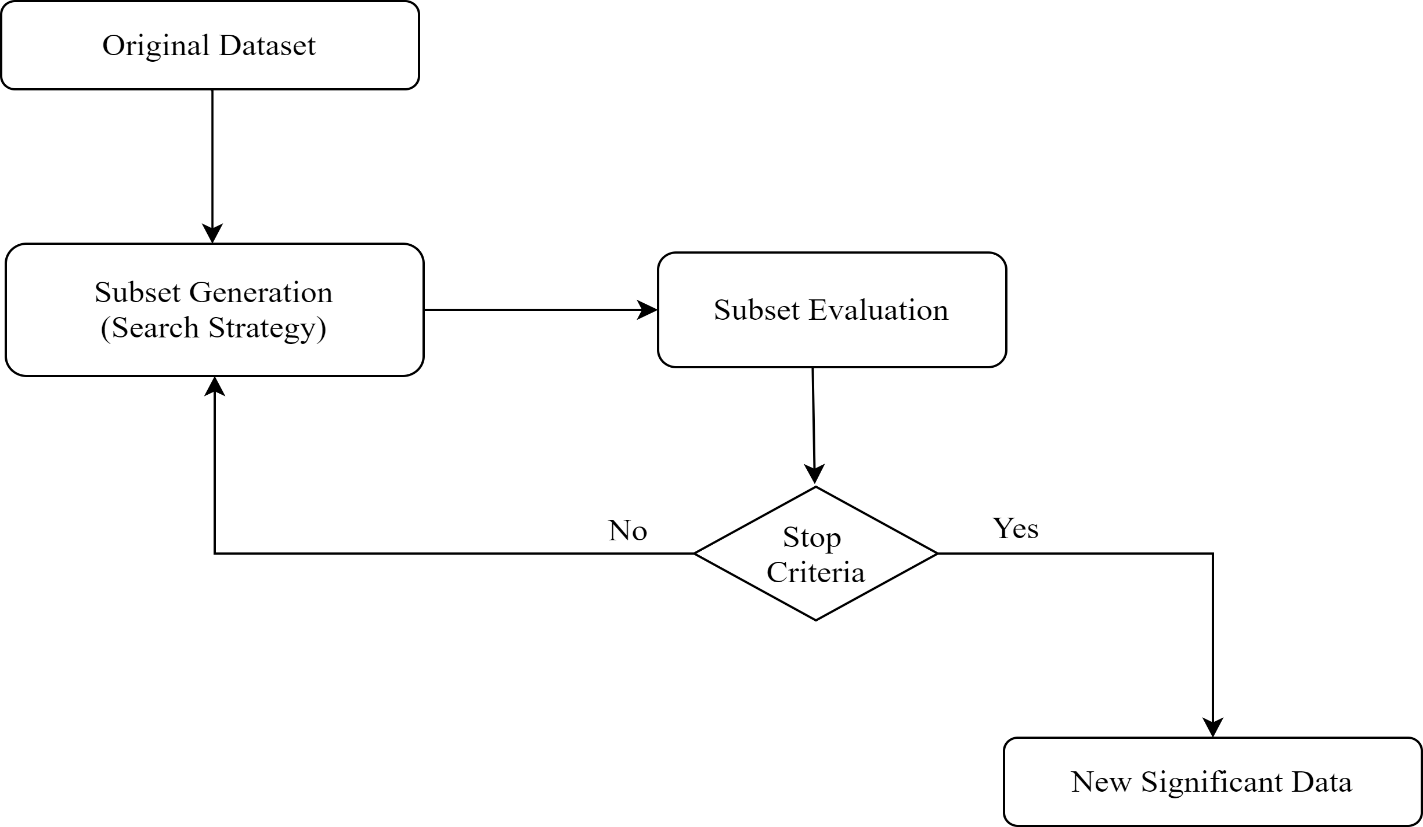

Supplement: Supplementary file 1 [file 1014eae42561484668b9799d.docx]
